# Supplementary material for: Evaluation of Haplotype Inference Using Definitive Haplotype Data Obtained from Complete Hydatidiform Moles, and Its Significance for the Analyses of Positively Selected Regions
Source: PLoS Genet. 2009 May 8;5(5):e1000468. doi: 10.1371/journal.pgen.1000468 (PMC2670534; doi:10.1371/journal.pgen.1000468)
Supplement: Table S5 — Candidate regions for recent differential selection by XP-EHH test between CHM and YRI. (0.06 MB XLS) [file pgen.1000468.s008.xls]

## Sheet: Table S5
Table S5. Candidate regions for recent differential selection by XP-EHH test between CHM and YRI
Chr.	Start	End	Genes in region	Allelea	Number of core SNPs with p-Value < 0.001	Maximum median XP-EHH scoreb	Rankc	Maximum XP-EHH score	Peak SNP	Selected Population	Compare Population	HapMap population for which positive selection was reportedd
2	9152306	9614622	ADAM17,CPSF3,DDEF2,IAH1,ITGB1BP1,LOC100127913	D	32	3.154	1	4.1751	rs6743955	CHM	YRI	ASN
2	177318121	177646172	FUCA1P,LOC100131991	D	38	2.9609	9	3.7866	rs7581975	CHM	YRI	ASN, CEU
15	61479950	62084982	DAPK2,FBXL22,HERC1,LOC100130855,MIRN422A,USP3	D	40	2.9166	13	4.9009	rs1018215	CHM	YRI	ASN
2	17576177	17852279	GEN1,LOC284952,SMC6,VSNL1	D	20	2.8373	31	3.5938	rs7572870	CHM	YRI
8	11686478	12634490	CTSB,DEFB130,DEFB134,DEFB136,DEFB137,DUB3,FAM86B1,FAM86B2,FAM90A25P,FAM90A2P,FDFT1,LOC100127885,LOC100128174,LOC100128995,LOC100131581,LOC100131718,LOC100132309,LOC100132923,LOC100133172,LOC100133184,LOC100133267,LOC392196,LOC392197,LOC442381,LOC646344,LOC649346,LOC649352,LOC728957,LOC729732,LONRF1,NR_003275.1,NR_003494.1,OR7E10P,OR7E158P,OR7E15P,OR7E160P,OR7E161P,OR7E8P,XR_017098.2,XR_037511.1,X…	D	20	2.7898	51	3.7278	rs9644758	CHM	YRI
2	205835683	205987145	PARD3B	D	9	2.6764	76	4.1001	rs2541152	CHM	YRI
11	25243965	25639145	LOC554234	D	28	2.5675	99	3.5472	rs12277717	CHM	YRI
10	94910281	95022651	LOC387703,XR_016730.2	D	8	2.504	105	3.3138	rs4918865	CHM	YRI
22	21581602	21916945	BCR,GNAZ,IGL@,IGLC4,IGLC5,IGLC6,IGLC7,IGLJ4,IGLJ5,IGLJ6,IGLJ7,LOC100133044,RAB36,RN7SLP3,RTDR1	D	12	2.4333	117	7.1036	rs6003387	CHM	YRI
1	187234323	187786871	LOC100131147	D	20	2.4322	124	5.0374	rs11800563	CHM	YRI
1	66886236	66940136	SGIP1	D	3	2.4017	146	6.5943	rs4655506	CHM	YRI
1	17247329	17309917	PADI2,SDHB	D	8	2.3796	151	3.9582	rs12134582	CHM	YRI
21	15895464	16285567	LOC100131399,USP25	D	11	2.3749	154	3.3911	rs11909487	CHM	YRI
1	103166045	103409195	COL11A1	D	6	2.3144	173	2.8951	rs3126212	CHM	YRI
12	125441494	125517408	LOC100128554,LOC728173	D	4	2.3037	175	3.5863	rs10773280	CHM	YRI
6	125861777	126062970	LOC643623,XR_041849.1	D	9	2.2381	211	3.0901	rs7758956	CHM	YRI
7	111604968	111870544	DOCK4,IFRD1,ZNF277	D	5	2.2332	216	2.6804	rs2006275	CHM	YRI
1	175039581	175194549	ASTN1,PAPPA2	D	4	2.2296	222	4.0058	rs6685449	CHM	YRI
8	11322596	11368456	C8orf12,C8orf13,XR_041853.1	D	4	2.2062	239	3.6755	rs12114115	CHM	YRI
3	104076475	104266826		D	4	2.191	247	3.5778	rs12497289	CHM	YRI
10	22259562	22754723	BMI1,COMMD3,DNAJC1,LOC100130992,LOC338098,LOC340900,LOC645220,LOC729308,SPAG6,TRNAN-GUU	D	5	2.172	256	2.8862	rs4437938	CHM	YRI	ASN, CEU
11	24921413	25058086	LUZP2	D	5	2.1662	261	2.8162	rs12049857	CHM	YRI
17	53221286	53542237	CUEDC1,DYNLL2,FLJ44342,LOC100128440,MRPS23,SFRS1,VEZF1,XR_040497.1	D	2	2.1538	276	3.7885	rs9908668	CHM	YRI	ASN
18	49765501	49999395	LOC100133176,MBD2	D	9	2.1427	281	3.1136	rs16957802	CHM	YRI
1	75878345	75987096	ACADM,DLSTP	D	5	2.1383	291	7.2209	rs9660848	CHM	YRI
4	33406328	33830484		D	1	2.1324	296	3.327	rs7664751	CHM	YRI
11	39710627	39821570		D	6	2.1316	297	3.9815	rs12364216	CHM	YRI
10	86995564	87092294		D	3	2.1206	305	4.7141	rs883800	CHM	YRI
6	30995323	31130092	C6orf205,DPCR1,HCG22,LOC100129065,LOC729792,NR_003948.1,SFTPG,VARS2	D	18	2.986	1	3.0859	rs2530705	YRI	CHM
22	33426659	33549750		D	11	2.6214	10	5.6871	rs137238	YRI	CHM
1	220278738	221703655	C1orf58,C1orf65,C1orf80,DISP1,FLJ43505,KIAA1822L,LOC100130483,LOC100132960,LOC648154,LOC653056,LOC728417,LOC728615,LOC728624,MIA3,SUSD4,TAF1A,TLR5,TRNAT-UGU,XR_037128.1,XR_038448.1,XR_042338.1	D	17	2.1971	14	3.5345	rs12036840	YRI	CHM
22	29653900	30450373	C22orf30,DRG1,EIF4ENIF1,FLJ20464,LIMK2,LOC100128535,LOC100133224,MGC15705,MORC2,NR_002323.1,PATZ1,PIB5PA,PIK3IP1,PISD,PLA2G3,PPP1R14BP1,RNF185,SELM,SFI1,SMTN,TUG1,XR_040036.1,XR_040880.1	D	34	2.1908	21	11.6683	rs5997937	YRI	CHM
7	49826841	50117805	LOC100128734,LOC100130988,VWC2,ZPBP	D	13	2.1795	29	3.0498	rs2221656	YRI	CHM
11	84437325	84502794		D	1	2.1666	37	6.5098	rs568641	YRI	CHM
7	98277480	98638081	KPNA7,SMURF1,TMEM130,TRRAP,XR_041425.1	D	10	2.0969	43	2.5955	rs13240075	YRI	CHM
6	167646922	168212567	C6orf123,C6orf124,FRMD1,KIF25,LOC100128124,LOC100128261,LOC401286,LOC441178,LOC441179,MLLT4,TCP10,TTLL2,UNC93A,XR_017855.2,XR_039815.1,XR_040757.1,XR_040768.1	D	22	2.0334	49	4.3963	rs2516799	YRI	CHM
7	27527429	27684241	HIBADH	D	6	1.9732	61	2.787	rs1404282	YRI	CHM
3	150089415	150350678	CPA3,GYG1,HLTF,HPS3,UBQLN4P	D	14	1.9705	62	5.275	rs6785178	YRI	CHM
2	154439858	154818170	GALNT13	D	16	1.9574	68	8.2264	rs11885387	YRI	CHM
7	53414475	53637707	LOC100129159	D	10	1.9351	74	4.7407	rs17135842	YRI	CHM
8	137812725	137923702		D	4	1.8197	112	3.2927	rs2582458	YRI	CHM
3	50826104	51102420	DOCK3	D	1	1.811	116	1.811	rs1947607	YRI	CHM
3	165136122	165235807	LOC730129	D	9	1.7973	123	1.8697	rs3849466	YRI	CHM
20	39999139	40120947	LOC643172	D	10	1.7816	129	3.5958	rs6016664	YRI	CHM
5	135429577	135645497	LOC389332,MIRN886,SMAD5,SMAD5OS,TRPC7,XR_017768.2,XR_041123.1	D	8	1.7485	139	2.3021	rs6596289	YRI	CHM
2	135259447	135624316	ACMSD,CCNT2,LOC100129961,RAB3GAP1,YSK4	D	15	1.7371	145	2.4735	rs16831108	YRI	CHM	CEU
10	131816432	131885351	GLRX3	D	2	1.6633	169	4.402	rs766532	YRI	CHM
5	166107868	166370993		D	8	1.6484	175	3.818	rs1432926	YRI	CHM
1	61379622	61504240	LOC645030,NFIA	D	2	1.6339	185	5.6713	rs334716	YRI	CHM
8	129228127	129358294		D	15	1.6274	187	2.8454	rs2648849	YRI	CHM
22	28907589	29215980	KIAA1656,LIF,LOC550631,LOC646513,LOC652968,LOC729980,MTP18,NR_001580.1,OSM,RNF215,SDC4P,SEC14L2,SEC14L3,SEC14L4,SF3A1,TBC1D10A,XR_040414.1	D	14	1.6157	191	3.2607	rs5749104	YRI	CHM
9	16577648	16740348	BNC2,LOC100130943	D	7	1.6067	202	2.3843	rs2297176	YRI	CHM
6	31244693	31350938	HCG27,HLA-C,LOC100130889,POU5F1	D	3	1.6057	208	3.2102	rs6899874	YRI	CHM
8	117691752	117910955	C8orf53,EIF3H	D	9	1.5948	220	3.2251	rs7833054	YRI	CHM
9	114260009	114613402	C9orf80,HSDL2,KIAA1958,LOC100133204,SNX30	D	3	1.5926	231	2.2099	rs10117017	YRI	CHM
7	80361857	80559235	SEMA3C	D	13	1.5844	233	3.9606	rs1729435	YRI	CHM
12	30940370	31037902	TSPAN11	D	7	1.58	241	3.9282	rs11051162	YRI	CHM
1	113679834	114153229	LOC100131737,MAGI3,PHTF1,RSBN1,XR_038332.1	D	2	1.5781	246	3.2307	rs17013326	YRI	CHM
2	47978008	48162526	FBXO11,LOC100133087,LOC646907	D	1	1.5542	262	2.7156	rs6545013	YRI	CHM
8	133474900	133594689	KCNQ3	D	4	1.5426	273	3.3228	rs2597363	YRI	CHM
10	28774661	28945085	LOC220906,WAC	D	2	1.5422	277	5.1081	rs2807763	YRI	CHM
1	190044143	190266132		D	2	1.5276	296	2.7393	rs4132600	YRI	CHM
9	7811244	7925323		D	5	1.5251	299	2.2089	rs10976618	YRI	CHM
6	44215776	44432177	AARS2,CAPN11,HSP90AB1,NFKBIE,SLC29A1,SLC35B2,SPATS1,TCTE1,TMEM151B,TMEM63B	D	3	1.5185	305	2.3479	rs4711772	YRI	CHM
5	163811440	163930992		D	1	1.5141	319	3.0645	rs6556756	YRI	CHM
2	177329434	177582208	FUCA1P,LOC100131991	A	42	3.7109	1	4.0682	rs7586150	CHM	YRI	ASN, CEU
15	61530450	62030986	DAPK2,FBXL22,HERC1,LOC100130855,MIRN422A,USP3	A	43	3.6429	7	4.9749	rs17189387	CHM	YRI	ASN
2	9245644	9654635	ADAM17,CPSF3,DDEF2,IAH1,ITGB1BP1,LOC100127913,YWHAQ	A	33	3.5817	22	4.3238	rs10177742	CHM	YRI	ASN
1	187288611	187803756	LOC100131147	A	30	3.2992	56	4.1788	rs1418546	CHM	YRI
1	175064983	175202294	ASTN1,PAPPA2	A	26	3.2581	65	4.2012	rs4652201	CHM	YRI
2	205850080	205966039	PARD3B	A	15	3.203	89	4.0187	rs1207441	CHM	YRI
11	25295564	25561847		A	37	3.1967	103	4.1203	rs10834699	CHM	YRI
1	76027700	76251342	ASB17,LOC729766,MSH4,NR_002748.1,RABGGTB,SNORD45B	A	23	3.0933	145	3.9218	rs12410373	CHM	YRI
8	11688962	11882733	CTSB,DEFB136,DEFB137,FDFT1,OR7E158P,OR7E161P	A	23	3.0606	150	4.2413	rs12898	CHM	YRI
3	44897145	45095516	CLEC3B,EXOSC7,TGM4,ZDHHC3	A	14	3.0533	153	3.6672	rs10514712	CHM	YRI
4	33402604	33644336		A	2	2.976	205	3.5265	rs12645598	CHM	YRI
2	17499148	17674475	RAD51AP2,VSNL1	A	11	2.9721	220	3.4105	rs16983635	CHM	YRI
15	62144650	62852692	CSNK1G1,FAM96A,GAPDHL6,KIAA0101,LOC100128564,LOC644934,OAZ2,PPIB,RBPMS2,SNX1,SNX22,TRIP4,ZNF609	A	37	2.9719	224	3.4149	rs477966	CHM	YRI
2	82247787	82594518		A	16	2.9096	248	3.7841	rs6733403	CHM	YRI
10	94867708	94943686	LOC389997	A	2	2.9028	259	3.5243	rs17466628	CHM	YRI
1	75878202	76013288	ACADM,DLSTP	A	15	2.8979	264	3.3806	rs814885	CHM	YRI
17	56050216	56619799	BCAS3,LOC729617,LOC729621,PPM1D,TRNASTOP-UUA	A	9	2.8943	268	3.9235	rs7214111	CHM	YRI	CEU
10	93440975	93633175	LOC100128043,LOC653226,TNKS2	A	4	2.8624	317	3.3236	rs7091015	CHM	YRI
7	112163233	112373179	FLJ31818,LOC100128875,TMEM168	A	2	2.8128	359	3.1642	rs10271752	CHM	YRI
10	117496930	117602238	ATRNL1	A	2	2.8092	363	3.3515	rs10490919	CHM	YRI
2	199053320	199266424		A	10	2.8087	364	3.7061	rs1378410	CHM	YRI
10	86883722	86979283		A	5	2.7982	383	4.4475	rs7094082	CHM	YRI
15	62056766	62121519	DAPK2	A	4	2.795	388	3.8398	rs4776709	CHM	YRI
1	35673809	35933970	KIAA0319L,LOC100128791,NCDN,PSMB2,TFAP2E	A	3	2.7929	395	3.6583	rs636658	CHM	YRI
8	11324532	11365592	C8orf12,C8orf13,XR_041853.1	A	3	2.7903	399	3.385	rs12114115	CHM	YRI
1	220309400	221676242	C1orf58,C1orf65,C1orf80,DISP1,FLJ43505,KIAA1822L,LOC100130483,LOC100132960,LOC648154,LOC653056,LOC728417,LOC728615,LOC728624,MIA3,SUSD4,TAF1A,TLR5,TRNAT-UGU,XR_037128.1,XR_038448.1,XR_042338.1	A	45	3.4435	1	4.3193	rs17161994	YRI	CHM
8	57054784	57365000	CHCHD7,LOC100129237,LYN,MOS,NR_002437.1,PLAG1,PSMC6P,RPS20,SNORD54,XR_038117.1	A	7	3.2476	19	6.008	rs2667975	YRI	CHM
6	167640832	168136472	C6orf123,C6orf124,LOC100128124,LOC100128261,LOC401286,LOC441178,LOC441179,MLLT4,TCP10,TTLL2,UNC93A,XR_017855.2,XR_039815.1,XR_040757.1,XR_040768.1	A	21	2.479	38	3.7905	rs4072349	YRI	CHM
6	157426622	158026851	ARID1B,C6orf35,LOC100128551,LOC641708,LOC729517,XR_016007.1,ZDHHC14	A	16	2.1595	56	3.4254	rs4709360	YRI	CHM
3	170515988	170718091	LOC730004,MDS1,XR_039668.1	A	21	1.9445	77	3.1328	rs9859831	YRI	CHM
16	5892158	6062715	A2BP1,LOC100129334	A	31	1.7521	96	2.6125	rs17718128	YRI	CHM
6	144077451	144299332	C6orf94,LOC100128319,LTV1,PHACTR2	A	6	1.7054	103	2.3073	rs9386049	YRI	CHM
10	122876711	122919483	LOC646255,XR_017113.2	A	9	1.6232	114	1.6697	rs2130784	YRI	CHM
1	113635951	114214190	LOC100131737,MAGI3,PHTF1,PTPN22,RSBN1,XR_038332.1	A	22	1.6119	120	2.2645	rs12130729	YRI	CHM
9	8797814	8890067	LOC100130868,PTPRD	A	9	1.5846	124	2.4251	rs7870329	YRI	CHM
3	13733664	13881710	WNT7A	A	11	1.5812	132	2.4411	rs4340685	YRI	CHM
6	44172042	44389862	AARS2,CAPN11,HSP90AB1,LOC100131206,MRPL14,NFKBIE,SLC29A1,SLC35B2,TCTE1,TMEM151B,TMEM63B	A	15	1.5802	143	2.3532	rs10948125	YRI	CHM
22	29061066	29330274	GAL3ST1,KIAA1656,LOC550631,LOC646513,LOC730005,MTP18,NR_001580.1,PES1,PTPNS1L,RNF215,SDC4P,SEC14L2,SEC14L3,SEC14L4,SF3A1,XR_040414.1	A	20	1.5729	144	2.8992	rs4820854	YRI	CHM
3	76202201	76552705		A	11	1.5683	148	2.3013	rs9858587	YRI	CHM
5	5246662	5351350	ADAMTS16	A	12	1.563	158	2.2618	rs1560062	YRI	CHM
12	103609790	103821086	CHST11,SLC41A2	A	13	1.5544	167	2.1295	rs7301525	YRI	CHM
11	94545759	94692946	LOC100129203,SESN3	A	5	1.5396	184	2.0789	rs10466336	YRI	CHM
1	30949529	31090720	LAPTM5,LOC100129196,LOC100131664,MATN1	A	13	1.5358	187	2.1417	rs1407881	YRI	CHM
21	39367189	39454038	LOC391282	A	12	1.5324	195	2.0996	rs16997273	YRI	CHM
9	114162146	114371637	HSDL2,KIAA1958,LOC100133204,LOC644996,XR_016840.2	A	11	1.531	207	1.916	rs10981423	YRI	CHM
5	166119459	166301991		A	9	1.517	234	2.1026	rs6872688	YRI	CHM
1	41194097	41474773	CTPS,SCMH1,SLFNL1	A	11	1.5058	237	1.9659	rs2268677	YRI	CHM
9	111702455	111864122	AKAP2,LOC100131672,PALM2,PALM2-AKAP2,XR_039450.1	A	6	1.5053	238	2.1151	rs260193	YRI	CHM
17	3398497	3577370	CARKL,CTNS,GSG2,ITGAE,LOC100129685,P2RX5,TAX1BP3,TMEM93,TRPV1,TRPV3	A	1	1.4931	254	2.4777	rs224500	YRI	CHM
11	21214935	21366981	LOC100130160,NELL1	A	14	1.4915	255	1.9883	rs16907801	YRI	CHM
12	100812612	101004553	CCDC53,DRAM,LOC100129880,NUP37	A	11	1.4905	270	2.3078	rs9332443	YRI	CHM
1	190246723	190359690		A	9	1.4774	303	2.7393	rs7418151	YRI	CHM
12	23569819	23697144	SOX5	A	8	1.4606	325	2.6785	rs10743478	YRI	CHM
7	20358836	20424151	ITGB8	A	3	1.4526	346	1.8478	rs17142783	YRI	CHM
21	41034664	41127662	DSCAM	A	2	1.4487	357	2.1001	rs2205101	YRI	CHM
11	128227400	128321516	C11orf45,KCNJ1,KCNJ5,LOC100131487,P53AIP1	A	8	1.4476	359	2.1668	rs3765618	YRI	CHM
8	1237670	1365895	C8orf68	A	7	1.4468	367	2.3485	rs6558455	YRI	CHM
13	94740493	94884481	ABCC4,CLDN10	A	5	1.4374	387	2.1048	rs10508016	YRI	CHM
1	70641704	70796726	CTH,LOC100131616,LOC391048	A	9	1.4364	392	2.1551	rs3121981	YRI	CHM
Medians of the moving windows that consist of 20 contiguous SNPs were calculated. The regions were defined by merging overlapping significant windows having p < 0.001 of median XP-EHH.
aA and D indicate Ancestral and Derived allele, respectively.
bMedian of XP-EHH for each window were used to rank the windows.
cThe regions were ordered by the ranks of windows that had the highest rank within the regions.
dLists of regions for positive selection are obtained by previous reports (Sabeti, et al. [16]).
